# Supplementary material for: Transposable element and host silencing activity in gigantic genomes
Source: Front Cell Dev Biol. 2023 Feb 24;11:1124374. doi: 10.3389/fcell.2023.1124374 (PMC9998948; doi:10.3389/fcell.2023.1124374)
Supplement: Supplementary file 2 [file Table1.docx]

***Supplementary Material***

Jie Wang1*, Liang Yuan2, Jiaxing Tang1,3, Jiongyu Liu1, Cheng Sun4, Michael W. Itgen5, Guiying Chen3, Jianping Jiang1, Stanley K. Sessions6, Guangpu Zhang1,3*, Rachel Lockridge Mueller5*

**Correspondence:** Jie Wang, [wangjie@cib.ac.cn](mailto:wangjie@cib.ac.cn)**,** Guangpu Zhang, [zgp1122@outlook.com](mailto:zgp1122@outlook.com)**,** Rachel Lockridge Mueller, [rlm@colostate.edu](mailto:rlm@colostate.edu)

**S1 Samples and data used in this experiment**

| Tissue | Code | Sex | Mass:  g | STL:  cm | Collection  date | Source | Genomic sequencing | | RNA quality | | | | mRNA | | small RNA | |
| --- | --- | --- | --- | --- | --- | --- | --- | --- | --- | --- | --- | --- | --- | --- | --- | --- |
| Raw reads | Accession code1 | OD260/280 | OD260/230 | 28S/18S | RIN | Raw reads | Accession code2 | Raw reads | Accession code3 |
| Testis#1 | WQ07 | ♂ | 16.83 | 17.252 | 2017.8.22. | wild |  |  | 1.77 | 2.75 | 1.7 | 9.6 | 37,888,360 | CRR610084 | 19,717,749 | CRR610091 |
| Testis#2 | WQ08 | ♂ | 19.79 | 18.192 | 2017.8.22. | wild |  |  | 1.73 | 0.95 | 1.1 | 8.9 | 35,386,396 | CRR610085 | 21,815,001 | CRR610092 |
| Testis#3 | WQ10 | ♂ | 12.02 | 16.441 | 2017.8.22. | wild |  |  | 2.00 | 3.22 | 1.7 | 9.4 | 34,854,594 | CRR610086 | 16,177,680 | CRR610093 |
| Testis#4 | WQ05 | ♂ | 20.48 | 15.591 | 2017.8.22. | captive |  |  | 1.70 | 2.13 | 1.7 | 9.3 | 31,732,246 | CRR610083 | 19,005,099 | CRR610090 |
| Ovary#1 | WQ03 | ♀ | 32.85 | 21.001 | 2017.8.22. | captive | 11,960,858 | CRR609958 | 1.96 | 0.68 | 1.1 | 9.3 | 38,466,202 | CRR610080 | 17,965,762 | CRR610088 |
| Ovary#2 | WQ02 | ♀ | 28.61 | 20.804 | 2017.8.22. | captive |  |  | 1.64 | 0.49 | 1.5 | 9.6 | 40,660,732 | CRR610079 | 15,836,634 | CRR610087 |
| Ovary#3 | WQ04 | ♀ | 35.37 | 20.437 | 2017.8.22. | captive |  |  | 1.64 | 0.22 | 0.8 | 8.7 | 39,418,784 | CRR610081 | 14,063,357 | CRR610089 |
| Ovary#4 | WQ06 | ♀ | 23.57 | 18.149 | 2017.8.22. | captive |  |  | 1.66 | 0.15 | 0.1 | 7.74 | 39,229,748 | CRR610082 |  |  |

1https://ngdc.cncb.ac.cn/gsa/browse/CRA008892

2https://ngdc.cncb.ac.cn/gsa/browse/CRA008899

3https://ngdc.cncb.ac.cn/gsa/browse/CRA008900

4This individuals was deleted from the small RNA analysis because of its low RIN value.

**S2 Types of genomic repeats annotated by PASTEC**

| Type | No. of Contigs |
| --- | --- |
| Potential multiple host gene | 275 |
| SSR | 2,448 |
| Potential Chimeric | 1,088 |
| Conflicting evidence | 20 |
| noCat (unknown repeats) | 51,857 |
| known TEs | 54,221 |
| in total | 109,909 |

**S3 Expression levels of genes and TEs (left, females; right, males)**


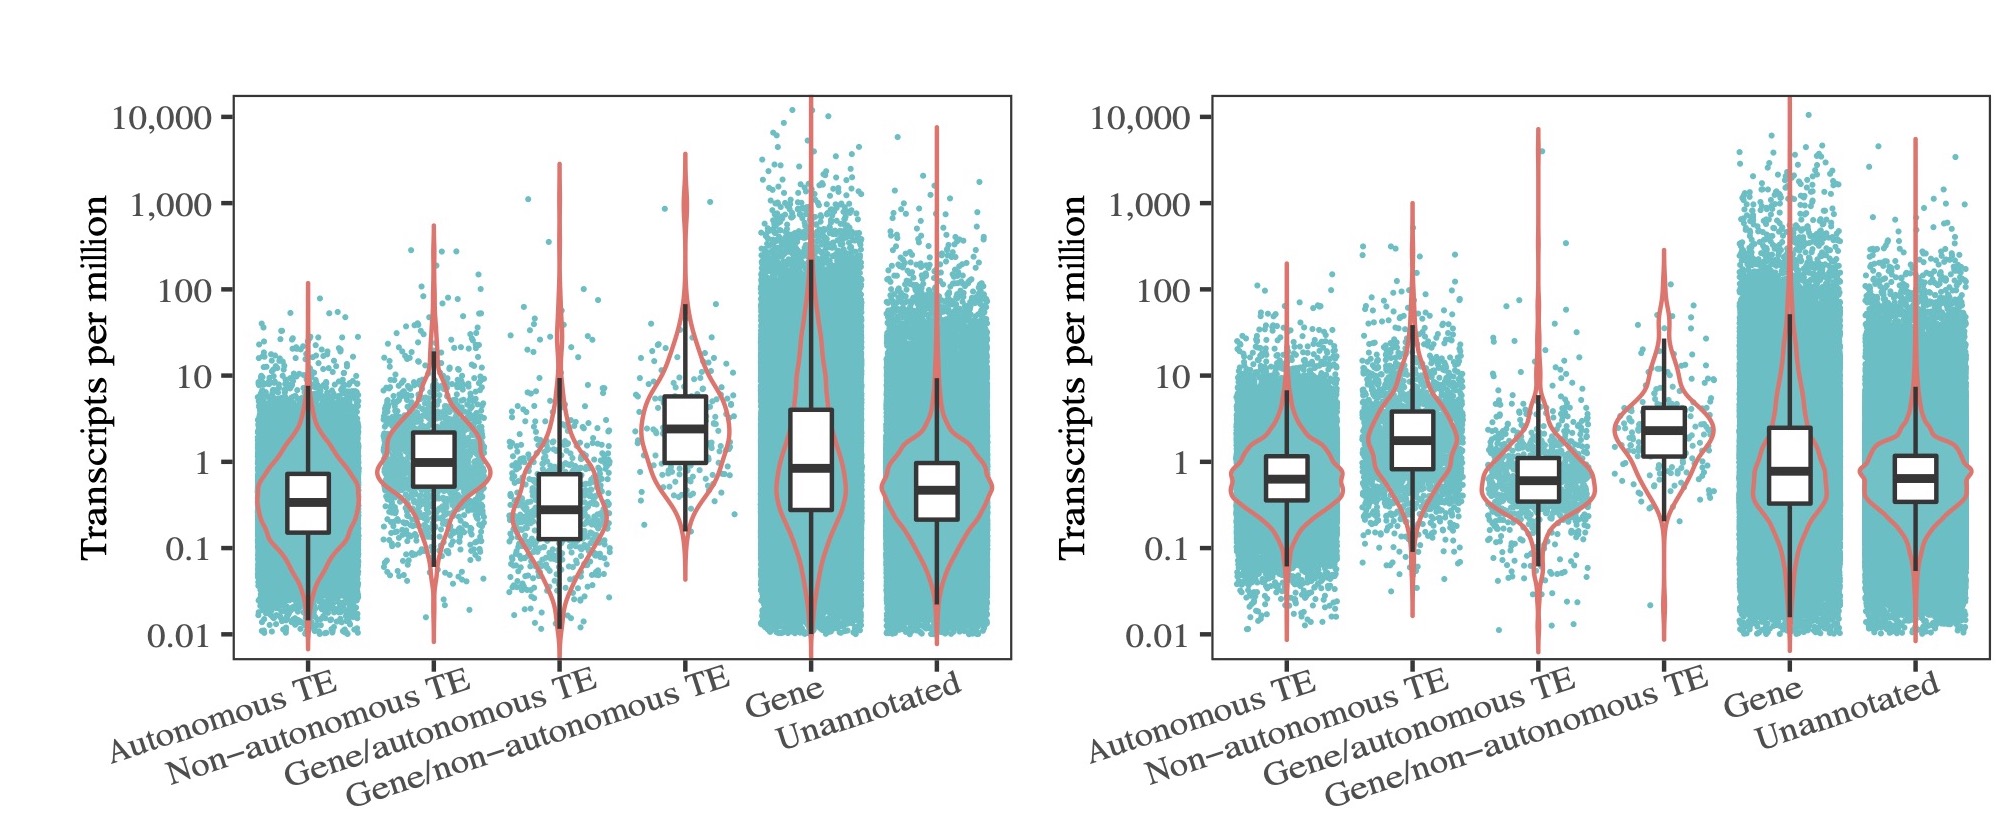


**S4 Genomic content, expression level of TEs, and putative piRNAs mapping to TEs superfamilies**

| Superfamily | TE Content in genome: % |  | TE expression | |  | Putative piRNAs mapping to TEs | |
| --- | --- | --- | --- | --- | --- | --- | --- |
| females (TPM) | males (TPM) | female (RPM) | males (RPM) |
| LTR/Gypsy | 3.85 |  | 826.9 | 3024.4 |  | 69264.4 | 59,160.3 |
| LTR/ERV | 0.41 |  | 391.9 | 693.9 |  | 45,392.8 | 39,045.4 |
| LTR/Copia | 0.1 |  | 30.9 | 25.7 |  | 111.3 | 99.7 |
| LTR/Retrovirus |  |  | 0.7 | 9.9 |  | 635.8 | 1,074 |
| DIRS/DIRS | 4.44 |  | 5427 | 11961.7 |  | 40,038.7 | 88,936.7 |
| PLE/Penelope | 0.09 |  | 122.8 | 351.6 |  | 17,211.8 | 17,062.2 |
| LINE/Jockey | 9.69 |  | 6206.5 | 15535.2 |  | 214,022.6 | 142,910.1 |
| LINE/L1 | 5.04 |  | 2954.2 | 7609.5 |  | 123,807.1 | 225,250.5 |
| LINE/I | 0.09 |  | 41.5 | 124.8 |  | 2,625.7 | 2,454.6 |
| LINE/RTE | 0.12 |  | 130 | 360.1 |  | 34,633.8 | 13,732 |
| SINE/5S | 0.23 |  | 5.3 | 1.3 |  | 110,673.1 | 16,152.2 |
| TRIM | 3.8 |  | 1650.8 | 5846.7 |  | 74,725.9 | 163,669.3 |
| LARD | 0.15 |  | 515.1 | 2643.3 |  | 37,826.3 | 63,559.3 |
| TIR/PIF-Harbinger | 2.98 |  | 575.2 | 1358.8 |  | 26,374.9 | 21,717.9 |
| TIR/hAT | 1.15 |  | 83.3 | 26.3 |  | 501.5 | 1,006.6 |
| TIR/Tc1-Mariner | 0.18 |  | 57.9 | 87.2 |  | 3,417.5 | 1,310.2 |
| TIR/PiggyBac | 0.05 |  | 21.2 | 14.8 |  | 1,901.3 | 7,152.2 |
| TIR/MuDR |  |  | 3.8 | 9.9 |  | 4,291.2 | 12,449.1 |
| MITE | 0.56 |  | 465.1 | 1188.4 |  | 8,138.3 | 8,119.6 |
| Maverick/Maverick | 0.05 |  | 44.2 | 761.9 |  | 22,994.6 | 9,898.3 |
| Helitron/Helitron | 0.18 |  | 2.1 | 10.3 |  | 726.5 | 9,262.4 |
|  |  |  |  |  |  |  |  |
| LTR/Retrovirus | - |  | 0.7 | 9.9 |  |  |  |
| LINE/R2 | - |  | 0 | 0.6 |  |  |  |
| SINE/7SL (Alu) | - |  | 1.2 | 0.3 |  |  |  |
| TIR/ISL2EU | - |  | 17.7 | 16.1 |  |  |  |
| TIR/Ginger1 | - |  | 10.2 | 6 |  |  |  |
| TIR/Academ | - |  | 5.1 | 8.5 |  |  |  |
| TIR/MuDR | - |  | 3.8 | 9.9 |  |  |  |
| TIR/CACTA |  |  | 1.9 | 0.8 |  |  |  |
| TIR/P | - |  | 0.6 | 0.6 |  |  |  |

**S5 The number of retained small RNA molecules after each processing step**

| Tissue | RIN value of RNA | Clean reads  (after FastX) | After  adapter cut  (18-40 nt) | riboRNA fragments removed | sRNA molecules  (22 nt) | miRNAs  (22nt, hit in miRBase) | miRNAs mapped to genes  (21-24 nt) | piRNAs  (25-30 nt) | Unique piRNAs  (25-30 nt) | piRNAs  mapped to TEs (25-30 nt) | ping pong occurrence  (10 bp overlap) |
| --- | --- | --- | --- | --- | --- | --- | --- | --- | --- | --- | --- |
| Testis#1 | 9.6 | 18,628,420 | 18,387,280 | 1,393,269 | 416,693 | 169,873 | 297,076 | 14,491,636 | 5,844,245 | 3,045,727 | 114,173 |
| Testis#2 | 8.9 | 20,632,085 | 20,127,121 | 702,889 | 743,042 | 306,713 | 360,612 | 14,928,178 | 5,812,644 | 2,443,896 | 90,569 |
| Testis#3 | 9.4 | 15,341,619 | 15,148,223 | 1,731,806 | 343,516 | 128,145 | 244,710 | 11,028,768 | 4,724,341 | 2,319,293 | 86,486 |
| Testis#4 | 9.3 | 18,141,749 | 18,022,557 | 682,282 | 220,515 | 84,628 | 124,381 | 15,672,237 | 2,598,248 | 1,264,088 | 37,855 |
|  |  |  |  |  |  |  |  |  |  |  |  |
| Ovary#1 | 9.3 | 17,133,153 | 16,652,089 | 2,708,832 | 1,619,086 | 959,868 | 852,065 | 7,423,955 | 2,535,654 | 2,503,814 | 31,837 |
| Ovary#2 | 9.6 | 15,112,304 | 14,382,824 | 2,298,340 | 2,025,800 | 1,191,104 | 601,043 | 5,576,455 | 1,023,454 | 1,805,324 | 3,567 |
| Ovary#3 | 8.7 | 13,323,488 | 11,664,671 | 4,260,265 | 1,226,450 | 504,288 | 482,384 | 2,820,885 | 882,817 | 897,586 | 5,151 |

**S6 The ratios of the summed expression of (A) piRNA pathway genes, (B) NuRD and associated repressive complex genes, and (C) TRIM28 to the summed expression of miRNA pathway genes in species with diverse genome sizes.** Only genes that occurred in all species were included. The species and their genome sizes (in Gb) from left to right are: *Platyplectrum ornatum* (1), *Gallus gallus* (1.3), *Danio rerio* (1.4), *Xenopus tropicalis* (1.7), *Anolis carolinensis* (2.2), *Mus musculus* (2.5), *Geotrypetes seraphini* (3.8), *Rhinatrema bivittatum* (5.3), *Caecilia tentaculate* (5.5), *Pleurodeles waltl* (20), *Ranodon sibiricus* (21), *Ambystoma mexicanum* (32), *Protopterus annectens* (43), *Cynops orientalis* (44), and *Protopterus aethiiopicus* (~130).


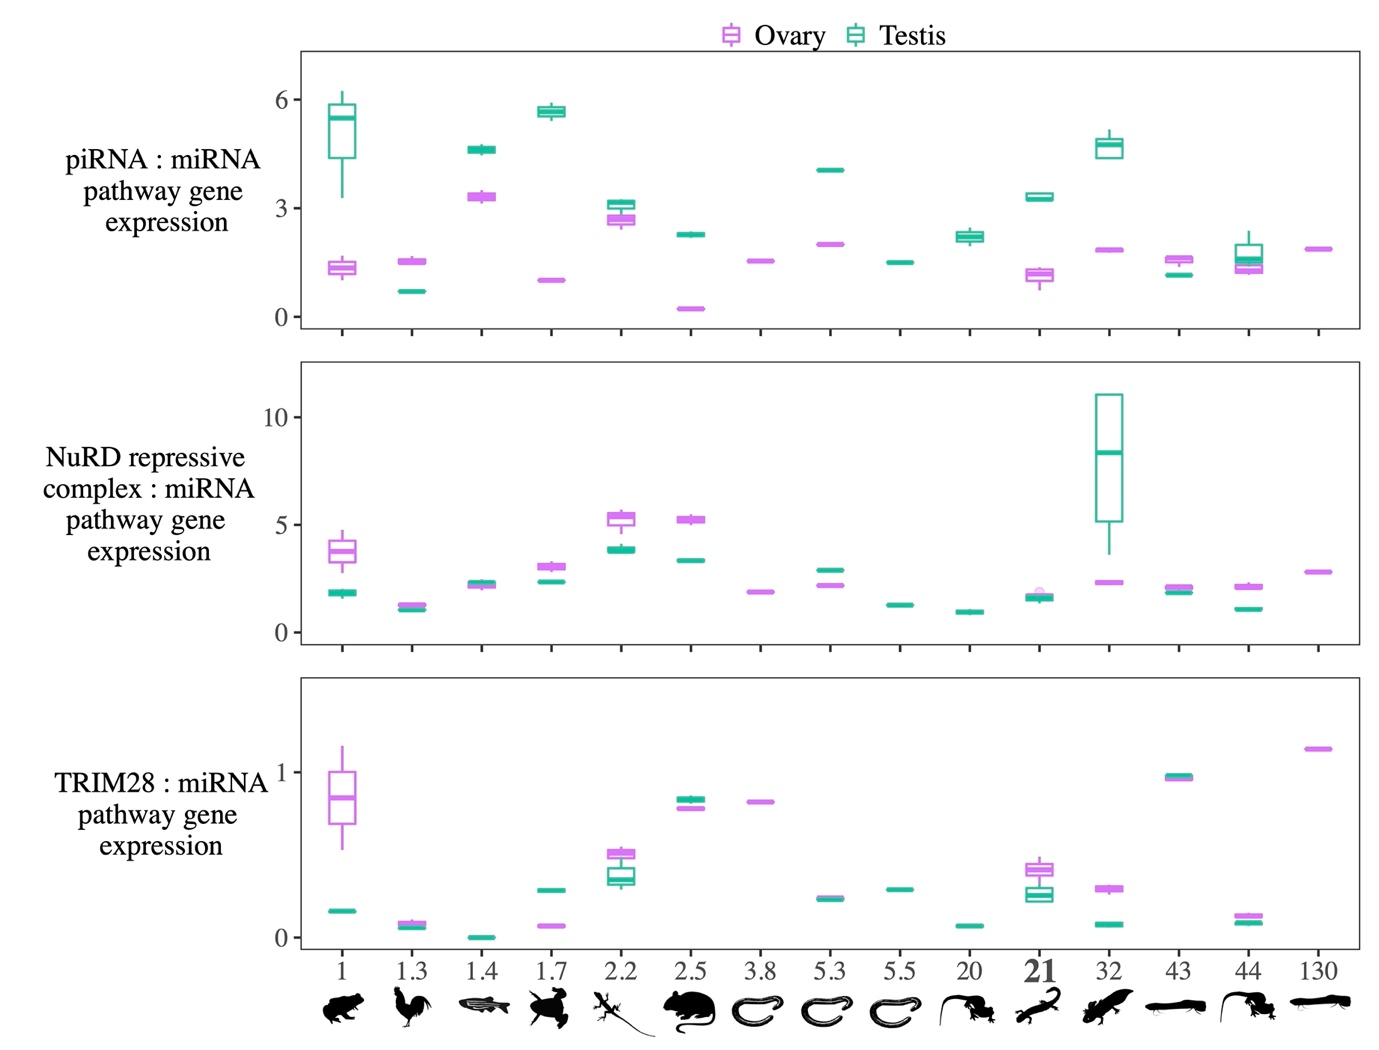


**S7 The summed expression of (A) piRNA pathway genes, (B) NuRD and associated repressive complex genes, (C) TRIM28, and (D) miRNA pathway genes in species with diverse genome sizes measured as TPM.** The species and their genome sizes from left to right are: *Platyplectrum ornatum* (1), *Gallus gallus* (1.3), *Danio rerio* (1.4), *Xenopus tropicalis* (1.7), *Anolis carolinensis* (2.2), *Mus musculus* (2.5), *Geotrypetes seraphini* (3.8), *Rhinatrema bivittatum* (5.3), *Caecilia tentaculate* (5.5), *Pleurodeles waltl* (20), *Ranodon sibiricus* (21), *Ambystoma mexicanum* (32), *Protopterus annectens* (43), *Cynops orientalis* (44), and *Protopterus aethiiopicus* (~130).


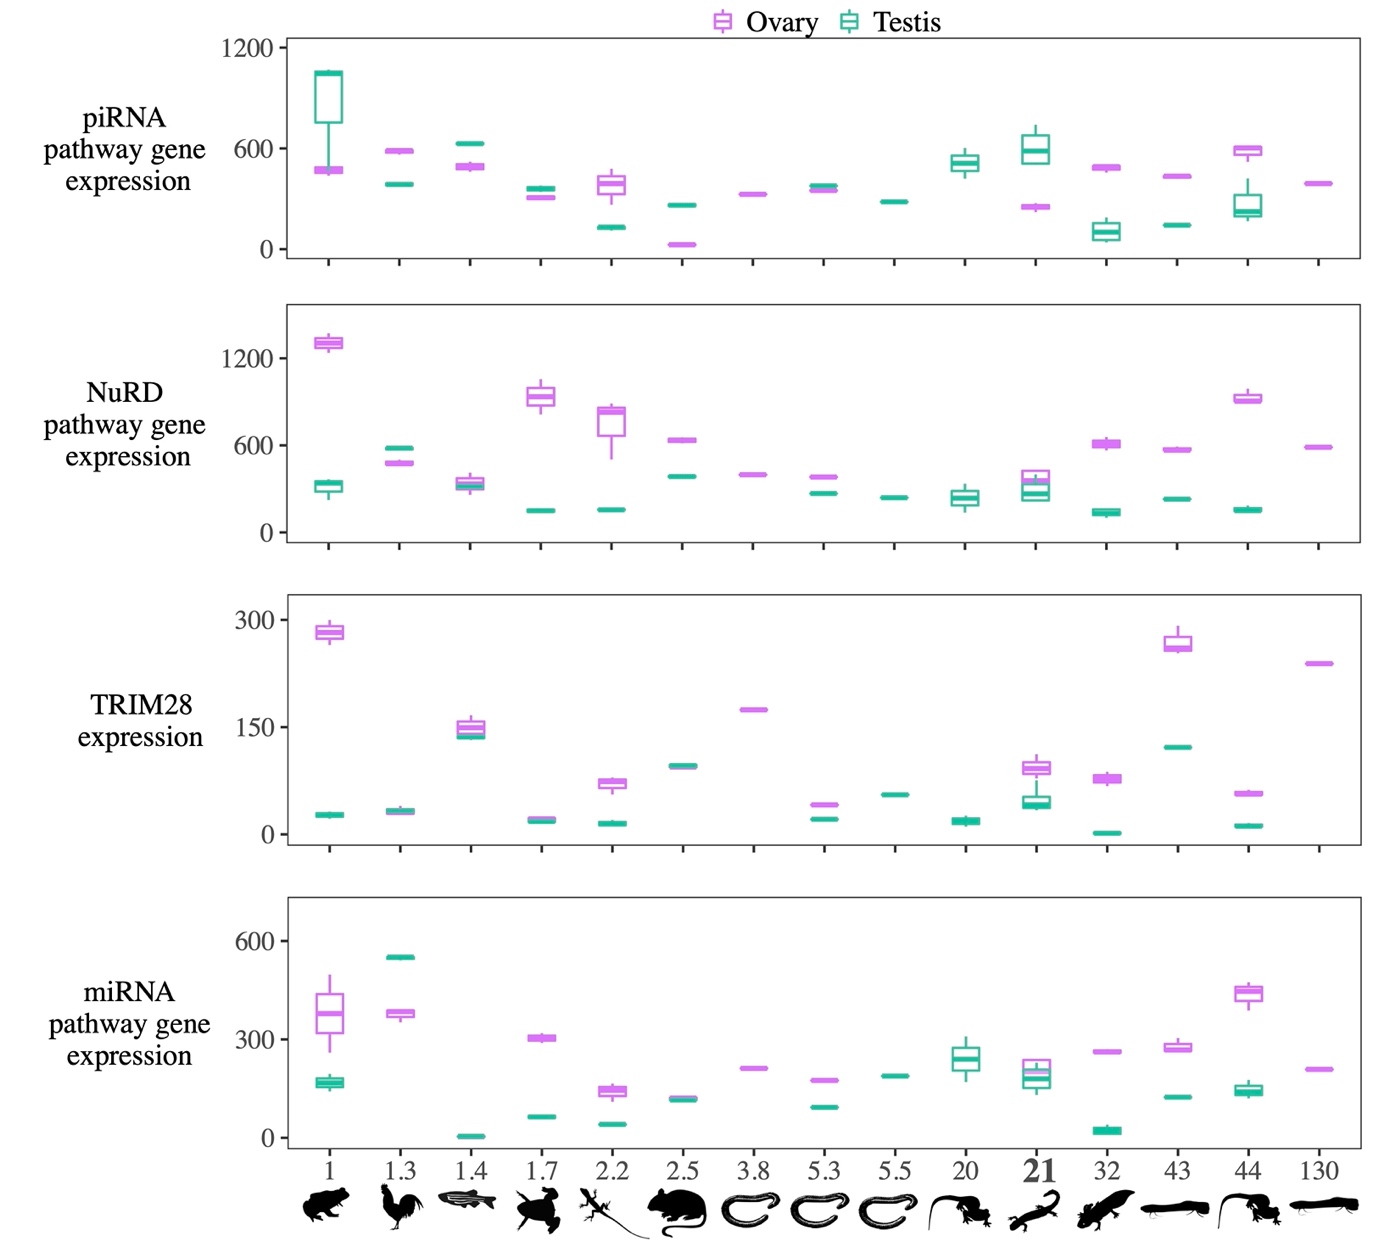


**S8 Species used for the analysis of piRNA pathway, miRNA pathway, NuRD and associated repressive complex genes, and TRIM28 genes**

| Animal type | Species name | Genome Size: Gb | No. of Testis samples | No. of ovary samples | Number of De novo assembled contigs | N50 of contigs |
| --- | --- | --- | --- | --- | --- | --- |
| lungfish | *Protopterus aethiopicus* | 130 |  | 1 | 80,874 | 2,584 |
| salamander | *Cynops orientalis* | 44 | 3 | 3 | 287,540 | 1,909 |
| lungfish | *Protopterus annectens* | 43 | 2 | 3 | 191,206 | 2,290 |
| salamander | *Ambystoma mexicanum* | 32 | 4 | 3 | 250,353 | 1,995 |
| salamander | *Ranodon sibiricus* | 21 | 4 | 4 | 510,439 | 1,250 |
| salamander | *Pleurodeles waltl* | 20 | 2 |  | 303,910 | 2,232 |
| caecilian | *Caecilia tentaculata* | 5.5 | 1 |  | 129,038 | 1,790 |
| caecilian | *Rhinatrema bivittatum* | 5.3 | 1 | 1 | 542,424 | 1,119 |
| caecilian | *Geotrypetes seraphini* | 3.8 |  | 1 | 334,360 | 1,527 |
| mouse | *Mus musculus* | 2.5 | 2 | 2 | 327,400 | 983 |
| lizard | *Anolis carolinensis* | 2.2 | 3 | 3 | 262,759 | 1,040 |
| frog | *Xenopus tropicalis* | 1.7 | 2 | 2 | 246,914 | 1,068 |
| fish | *Danio rerio* | 1.4 | 2 | 2 | 168,654 | 1,757 |
| bird | *Gallus gallus* | 1.3 | 3 | 3 | 757,972 | 2,154 |
| frog | *Platyplectrum ornatum* | 1.07 | 3 | 2 | 367,023 | 1,370 |

**S9 Samples used for the analysis of piRNA pathway, miRNA pathway, NuRD and associated repressive complex genes, and TRIM28 genes**

| **Species** | **Individuals** | **Code of dataset** | **Sequencing strategy** | **Total length of clean paired reads** |
| --- | --- | --- | --- | --- |
| *Platyplectrum ornatum* | Female_F1 | SRR13734432 | PE126 | 6,884,372,718 |
| *Platyplectrum ornatum* | male_M1 | SRR13734436 | PE126 | 3,519,736,155 |
| *Platyplectrum ornatum* | female_F2 | SRR13734440 | PE126 | 3,684,200,728 |
| *Platyplectrum ornatum* | male_M2 | SRR13734445 | PE126 | 3,159,099,352 |
| *Platyplectrum ornatum* | male_M3 | SRR13734453 | PE126 | 5,591,344,200 |
| *Gallus gallus* | M1 | SRR21413816 | PE150 | 6,801,083,731 |
| *Gallus gallus* | M2 | SRR21413817 | PE150 | 6,570,577,470 |
| *Gallus gallus* | M3 | SRR21413818 | PE150 | 7,021,840,670 |
| *Gallus gallus* | FM1 | SRR21413813 | PE150 | 6,709,497,312 |
| *Gallus gallus* | FM2 | SRR21413814 | PE150 | 6,570,023,137 |
| *Gallus gallus* | FM3 | SRR21413815 | PE150 | 6,800,803,540 |
| *Danio rerio* | M1 | SRR6841469 SRR6841470 SRR6841471 | PE76 | 14,132,566,824 |
| *Danio rerio* | M2 | SRR6841472 SRR6841473 SRR6841474 | PE76 | 12,451,819,259 |
| *Danio rerio* | FM1 | SRR6841457 SRR6841458 SRR6841459 | PE76 | 15,041,093,899 |
| *Danio rerio* | FM2 | SRR6841460 SRR6841461 SRR6841462 | PE76 | 14,383,695,630 |
| *Xenopus tropicalis* | M1 | SRR5412279 | SR101 | 4,491,825,839 |
| *Xenopus tropicalis* | M2 | SRR5412280 | SR101 | 4,959,481,791 |
| *Xenopus tropicalis* | FM1 | SRR5412277 | SR101 | 3,522,394,964 |
| *Xenopus tropicalis* | FM2 | SRR5412278 | SR101 | 3,433,990,644 |
| *Anolis carolinensis* | M1 | SRR5412171 | SR101 | 2,037,335,955 |
| *Anolis carolinensis* | M2 | SRR5412172 | SR101 | 2,328,660,042 |
| *Anolis carolinensis* | M3 | SRR5412173 | SE90 | 3,429,516,547 |
| *Anolis carolinensis* | FM1 | SRR5412168 | SR101 | 2,473,892,259 |
| *Anolis carolinensis* | FM2 | SRR5412169 | SR101 | 2,352,520,907 |
| *Anolis carolinensis* | FM3 | SRR5412170 | SE90 | 3,531,532,320 |
| *Mus musculus* | M1 | SRR5412203 | SR101 | 1,955,779,276 |
| *Mus musculus* | M2 | SRR5412204 | SR101 | 3,318,896,675 |
| *Mus musculus* | FM1 | SRR5412201 | SR101 | 2,277,704,981 |
| *Mus musculus* | FM2 | SRR5412202 | SR101 | 2,023,556,350 |
| *Rhinatrema bivittatum* | M1 | SRR5591432 | PE101 | 5,014,521,076 |
| *Rhinatrema bivittatum* | FM1 | ERR3132330 | PE150 | 22,243,030,188 |
| *Ambystoma mexicanum* | M1 | SRR2885287 | PE100 | 3,557,193,043 |
| *Ambystoma mexicanum* | M2 | SRR2885288 | PE100 | 3,018,140,755 |
| *Ambystoma mexicanum* | M3 | SRR2885289 | PE100 | 6,947,066,098 |
| *Ambystoma mexicanum* | M4 | SRR2885290 | PE100 | 2,254,388,959 |
| *Ambystoma mexicanum* | FM1 | SRR2885284 | PE100 | 3,046,610,392 |
| *Ambystoma mexicanum* | FM2 | SRR2885285 | PE100 | 2,480,135,684 |
| *Ambystoma mexicanum* | FM3 | SRR2885286 | PE100 | 2,806,064,782 |
| *Protopterus annectens* | M1 | SRR2028017 | PE90 | 7,004,563,990 |
| *Protopterus annectens* | FM1 | SRR2027978 | PE90 | 6,124,764,166 |
| *Protopterus annectens* | FM2 | SRR2027979 | PE90 | 6,518,099,880 |
| *Protopterus annectens* | FM3 | SRR2027980 | PE90 | 6,494,872,072 |
| *Protopterus aethiopicus* | FM1 | SRR7240708 | PE150 | 6,493,306,793 |
| *Cynops orientalis* | Ovary3_FG3 | SRR10305546 | PE122 | 4,994,921,293 |
| *Cynops orientalis* | Ovary2_FG2 | SRR10305545 | PE122 | 5,326,272,623 |
| *Cynops orientalis* | Ovary1_FG1 | SRR10305544 | PE122 | 4,550,235,130 |
| *Cynops orientalis* | Testis3_M3 | SRR10305543 | PE122 | 5,720,828,649 |
| *Cynops orientalis* | Testis2_M2 | SRR10305542 | PE122 | 5,634,805,471 |
| *Cynops orientalis* | Testis1_M1 | SRR10305541 | PE122 | 4,972,425,431 |
| *Ranodon sibiricus* | Testis_WQ05 | CRR610083 | PE150 | 4,468,359,749 |
| *Ranodon sibiricus* | Testis_WQ07 | CRR610084 | PE150 | 5,354,698,049 |
| *Ranodon sibiricus* | Testis_WQ08 | CRR610085 | PE150 | 5,054,882,981 |
| *Ranodon sibiricus* | Testis_WQ10 | CRR610086 | PE150 | 4,940,685,042 |
| *Ranodon sibiricus* | Ovary_WQ02 | CRR610079 | PE150 | 5,771,046,105 |
| *Ranodon sibiricus* | Ovary_WQ03 | CRR610080 | PE150 | 5,466,338,283 |
| *Ranodon sibiricus* | Ovary_WQ04 | CRR610081 | PE150 | 5,716,393,060 |
| *Ranodon sibiricus* | Ovary_WQ06 | CRR610082 | PE150 | 5,612,656,781 |
| *Pleurodeles waltl* | M3 | DRR138635 | PE106 | 3,580,009,573 |
| *Pleurodeles waltl* | M4 | DRR138637 | PE106 | 3,397,990,304 |
| *Caecilia tentaculata* | Testis | SRR5591445 | PE101 | 5,326,917,714 |
| *Geotrypetes seraphini* | Ovary | ERR3849999 | PE150 | 27,001,609,155 |
